# Supplementary material for: Tailored preparation of porous aromatic frameworks in a confined environment
Source: Royal Society of Chemistry journal article supplement (doi:10.1039/d2sc06930j), 2023-01-01
Supplement: d2sc06930j1.pdf [file d2sc06930j1.pdf]

## **Supplementary Information**

### **Tailored Preparation of Porous Aromatic Frameworks in Confined**

#### **Environment**

Ruihe Yu, Lin Liu, Liying Yin, Yege Jing, Ning Zhang,\* Hang Bian\* and Guangshan Zhu\*

Faculty of Chemistry, Northeast Normal University, Changchun, 130024, China. E-

mail: zhangn380@nenu.edu.cn; zhugs100@nenu.edu.cn

School of Material Science and Engineering, Jilin Jianzhu University, Changchun,

130118, China. E-mail: bhspring@gmail.com

## Supplementary characterization

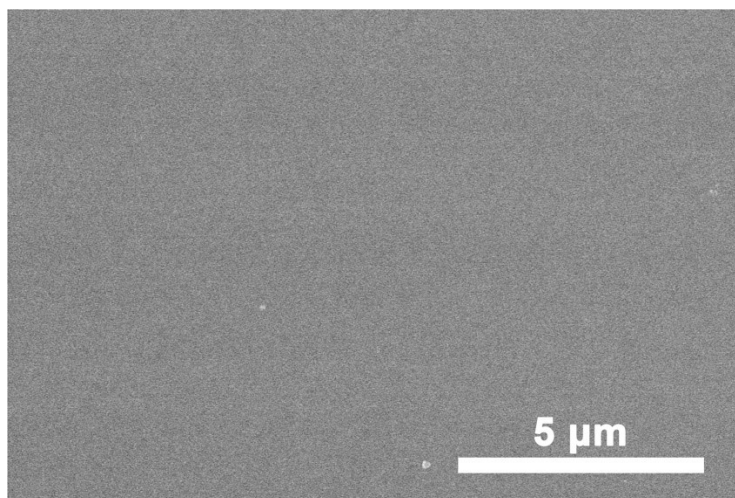

**Fig. S1** SEM image of PS/PAF-1 hybrid membrane formed on silicon substrates prior to membrane transfer.

In order to verify that PAF-1 powder was successfully obtained, the structure and composition of PAF-1 powder have been characterized by FT-IR spectroscopy and solid-state  $^{13}\text{C}$  CP/MAS NMR spectroscopy. As shown in **Fig. S2a**, the disappearance of the C-Br bonds ( $\sim 1078\text{ cm}^{-1}$ ,  $500\text{-}600\text{ cm}^{-1}$ ) indicates the complete conversion of TBMP. The resonance signals at 146, 140, 131, 125, and 64 ppm are resolved (**Fig. S2b**), which are consistent with the previous report.<sup>5</sup> In addition, the nitrogen adsorption-desorption isotherm of PAF-1 powder was tested at 77 K which shows a classic type I isotherm according to **Fig. S2c**. The Brunauer-Emmett-Teller (BET) surface area of PAF-1 was calculated to be  $4765\text{ m}^2/\text{g}$ . The pore size of PAF-1 was calculated according to Density Functional Theory (DFT) which was calculated to be 1.19 nm (**Fig. S2d**).

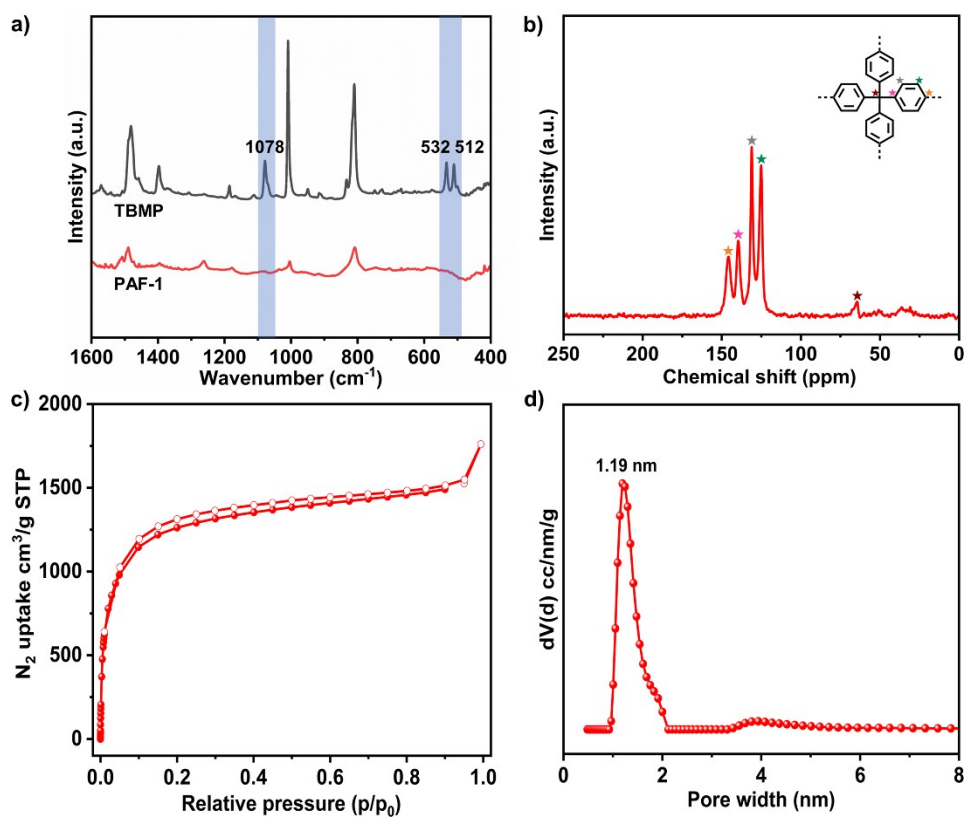

**Fig. S2** a) FT-IR spectra of the TBMP (grey) and PAF-1 powder (red) from 400-1600 cm<sup>-1</sup>; b) Solid-state <sup>13</sup>C CP/MAS NMR spectrum of PAF-1; c) Nitrogen adsorption-desorption isotherm measured at 77 k for PAF-1; d) The pore size of PAF-1 was calculated according to Density Functional Theory (DFT).

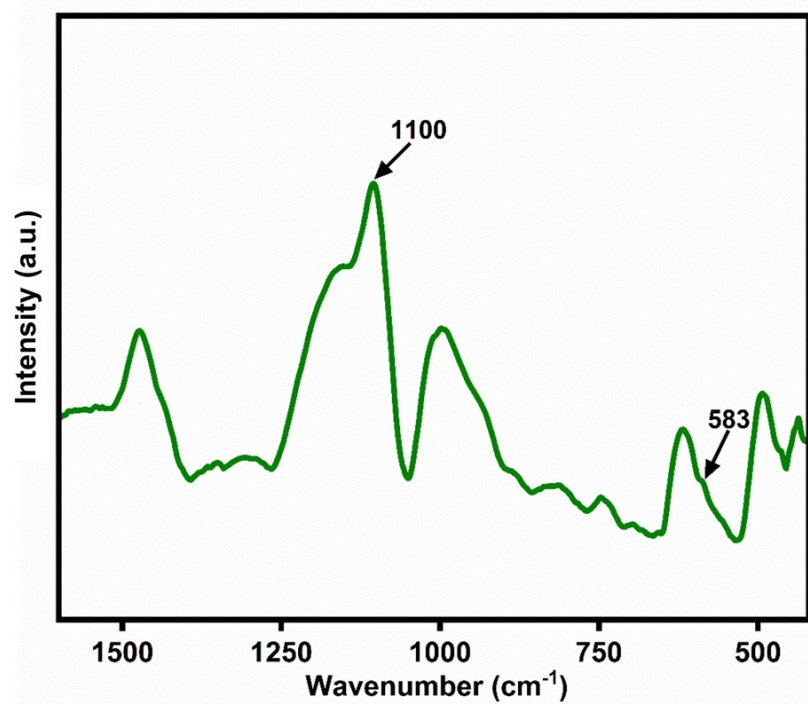

**Fig. S3** FT-IR spectrum of poly(4-bromostyrene-co-styrene) brushes.

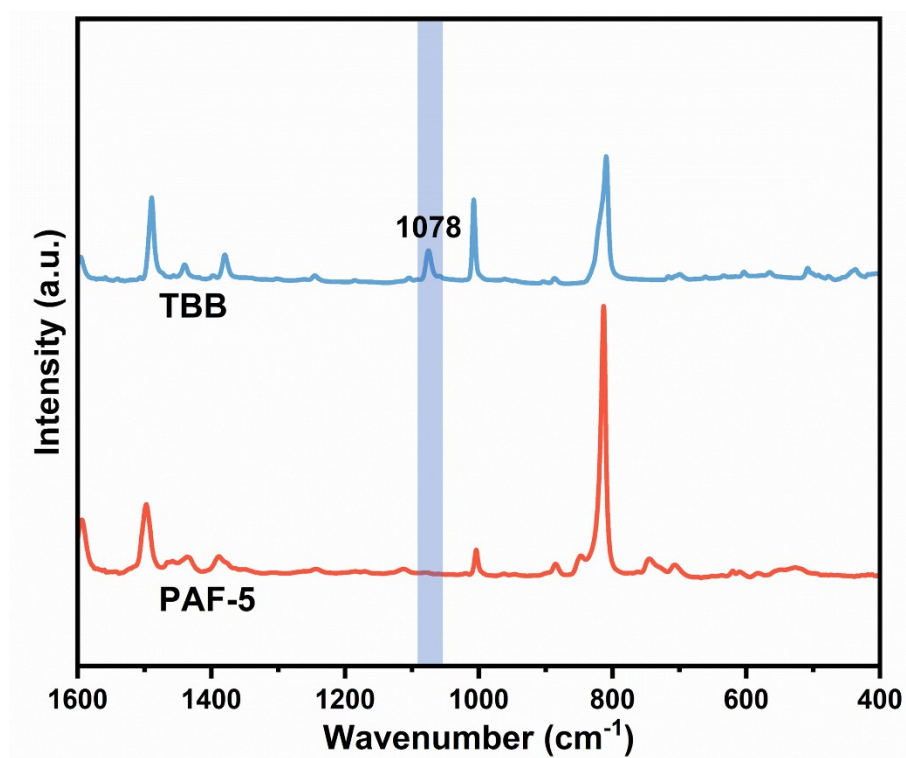

**Fig. S4** FT-IR spectra of the TBB (blue) and PAF-5 powder (orange) from 400-1600 cm<sup>-1</sup>.

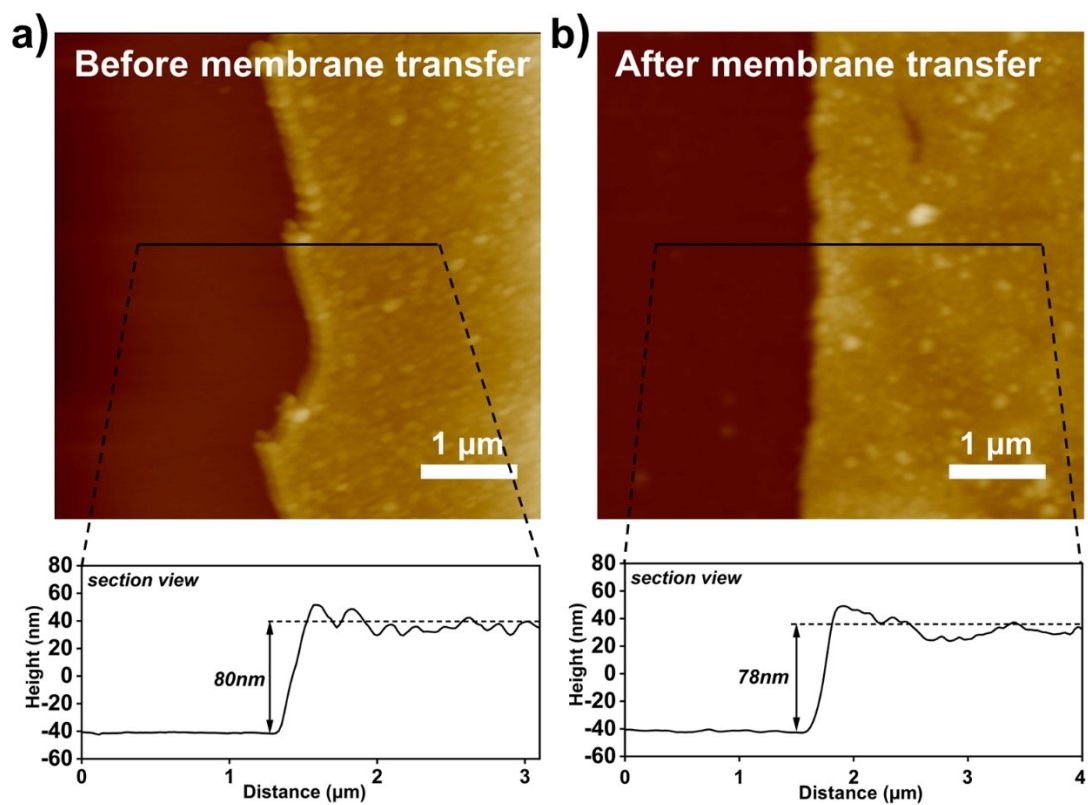

**Fig. S5** AFM scans and the corresponding of section view of PS/PAF-1 hybrid membrane before a) and after b) the process of membrane transfer.

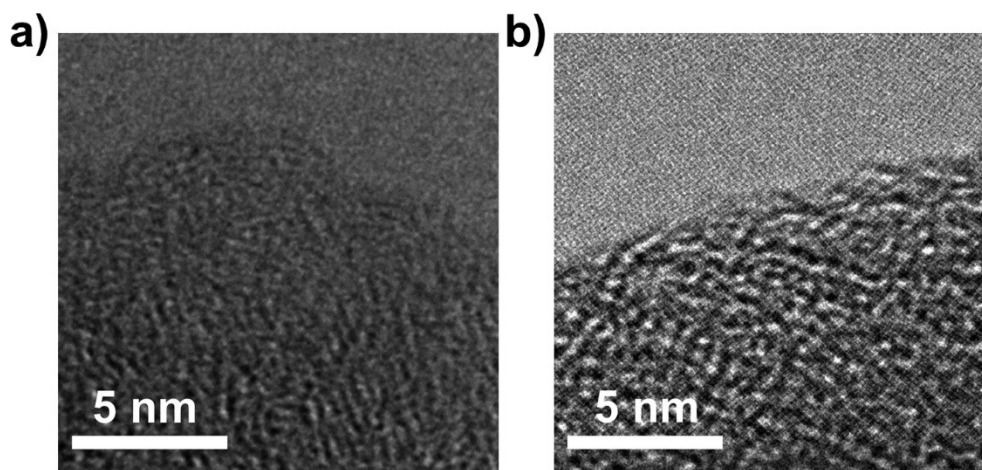

**Fig. S6** HRTEM images of on the regions of a) PS and b) PAF-1 of the hybrid membrane.

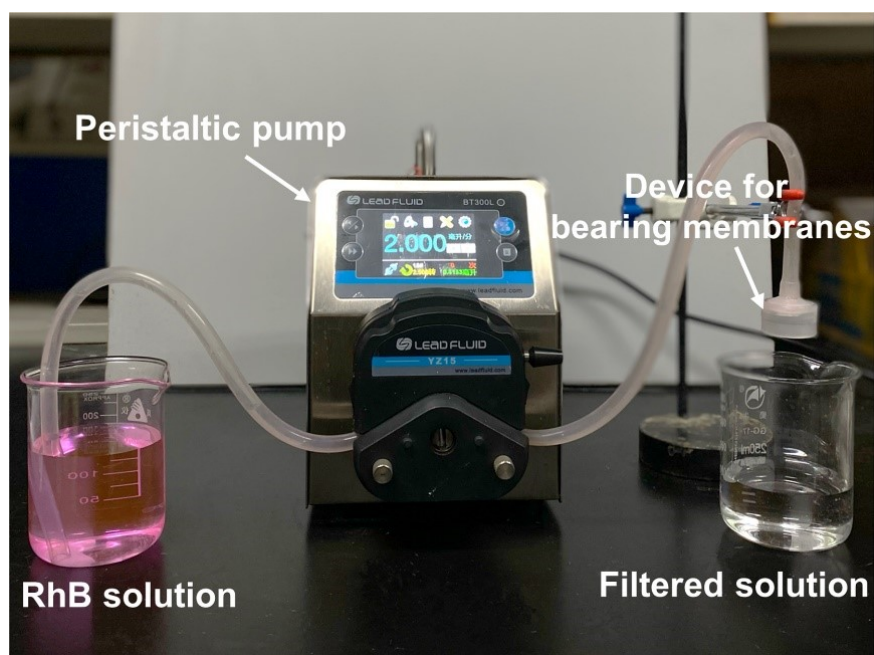

**Fig. S7** Continuous flow device.

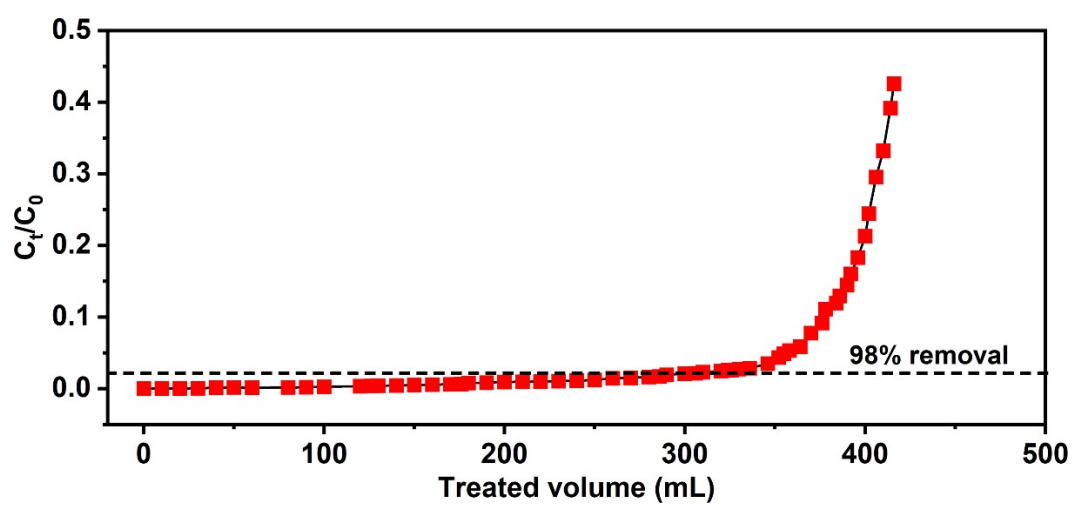

**Fig. S8** Adsorption curve of PS/PAF-1 hybrid membrane.
